# Supplementary material for: In vitro integration of ribosomal RNA synthesis, ribosome assembly, and translation
Source: PubMed Central journal article supplement — Mol Syst Biol. 2013 Jun 25;9:678. doi: 10.1038/msb.2013.31 (PMC3964315; doi:10.1038/msb.2013.31), 2013-06-25
Supplement: msb201331-s1.pdf [file msb201331-s1.pdf]

# ***In vitro* integration of ribosomal RNA synthesis, ribosome assembly, and translation**

Michael C. Jewett<sup>1,2</sup>, Brian R. Fritz<sup>2</sup>, Laura E. Timmerman<sup>2</sup>, and George M. Church<sup>1</sup>

<sup>1</sup> Department of Genetics, Harvard Medical School, 77 Avenue Louis Pasteur, Boston, Massachusetts 02115 USA

<sup>2</sup> Department of Chemical and Biological Engineering, Northwestern University, 2145 Sheridan Road, Evanston, IL 60208, USA.

Correspondence and request for materials should be addressed to:  
gchurch@genetics.med.harvard.edu, m-jewett@northwestern.edu.

## **Supplementary Information**

Submitted to *Molecular Systems Biology* as a Report

## Supplementary Table 1

| Reagent                | [Reagent] <sub>final</sub> (this work) | [Reagent] <sub>final</sub> (Nierhaus, 1990)* |
|------------------------|----------------------------------------|----------------------------------------------|
| Magnesium              | 16.4 mM                                | 10.3 mM                                      |
| Ammonium               | 10 mM                                  | 169 mM                                       |
| Potassium              | 130 mM                                 |                                              |
| Glutamate              | 154 mM                                 |                                              |
| Chloride               |                                        | 170 mM                                       |
| Acetate                | 2.4 mM                                 | 9.1 mM                                       |
| ATP                    | 1.2 mM                                 | 1.50 mM                                      |
| GTP**                  | 0.86 mM                                | 0.05 mM                                      |
| UTP**                  | 0.86 mM                                |                                              |
| CTP**                  | 0.86 mM                                |                                              |
| Folinic acid           | 34 µg/mL                               |                                              |
| tRNA                   | 171 µg/mL                              | 333 µg/mL                                    |
| Amino acids***         | 2 mM                                   | 0.08 mM                                      |
| PEP                    | 33 mM                                  | 5.00 mM                                      |
| Pyruvate Kinase        | 1.63 µg/mL                             | 25 µg/mL                                     |
| NAD                    | 0.33 mM                                |                                              |
| CoA                    | 0.27 mM                                |                                              |
| HEPES-KOH, pH 7.6 (4C) | 57 mM                                  | 5.83 mM                                      |
| Tris-HCL, pH 8.0 (4C)  |                                        | 17.08 mM                                     |
| Tris-OAc, pH 7.5 (4C)  | 2.4 mM                                 |                                              |
| Oxalic acid            | 4 mM                                   |                                              |
| Putrescine             | 1 mM                                   |                                              |
| Spermidine             | 1.5 mM                                 | 0.58 mM                                      |
| Spermine               |                                        | 0.06 mM                                      |
| EDTA                   |                                        | 0.33 mM                                      |
| S150 Extract           | 0.24 vol/vol                           | 0.21 vol/vol                                 |
| T7 RNA polymerase**    | 100 µg/mL                              |                                              |
| Template (DNA or RNA)  | 13 µg/mL                               | 830 µg/mL                                    |

\* Note: The ionic milieu was calculated by summing the moles of salt from the energy mix, buffer 3 carry over (which contains the S-150 enzymes), and the reconstitution mixture.

\*\*Because this work uses a combined transcription and translation system, GTP, UTP, CTP, and T7 RNA polymerase are present and lacking in the original poly(Phe) system.

\*\*\*In this work, 20 amino acids are used. In the original poly(Phe) system, only phenylalanine is added.

\*\*\*\*In this work, 2.4mM Tris-OAc and 2.4mM magnesium acetate carry over into the protein synthesis reaction from the S150 extract.

**Supplementary Table 1** | Comparison of final reagent concentrations in the extract based transcription and translation system from this work and from the classic poly (Phe) system (Nierhaus, 1990).

## Supplementary Table 2

| Ionic solute/Additive  | Optimization profile (mM/fraction of maximum yield) |           |          |          |          |          |
|------------------------|-----------------------------------------------------|-----------|----------|----------|----------|----------|
| Potassium Glutamate    | 100/0.90                                            | 130/1.00  | 190/0.95 | 260/0.73 | 320/0.17 | 380/0.05 |
| Putrescine             | 1/1.00                                              | 2/1.00    | 4/0.89   | 6/0.70   | 8/0.63   | 10/0.29  |
| Spermidine             | 0.5/0.47                                            | 1/0.91    | 1.5/1.00 | 2/0.95   | 3/0.60   |          |
| Spermine               | 0/1.00                                              | 0.25/0.74 | 0.5/0.42 | 1.0/0.10 |          |          |
| r-protein/rRNA ratio * | 0.9/0.83                                            | 1.1/1.00  | 1.3/0.61 | 1.5/0.16 |          |          |
| Chaperones #           | -/1.00                                              | +/0.98    |          |          |          |          |

\* In this case mM is replaced by the r-protein/rRNA ratio

# In this case mM is replaced with "+" or "-" to indicate presence or absence of additional chaperones

**Supplementary Table 2** | Optimization studies in 50S subunit assembly and translation reactions aided by S150 extracts based on relative active Fluc expression. The trends for potassium glutamate, putrescine, spermidine, spermine, r-protein/rRNA ratio, and chaperone addition are shown. The values given as “100/ 0.90” indicate that a 100mM concentration of that ionic solute was added to the reaction and that 90% of the maximum expression of Fluc was achieved at that particular concentration. Only one solute was varied at a time. Fifteen microliter reactions were incubated at 37°C for 4h. Reference conditions, which also turned out to be optimum, were 130mM potassium glutamate, 1mM putrescine, 1.5mM spermidine, and 0mM spermine, as well as a TP50/rRNA ratio of 1.1. For chaperone addition, 1.5pmol DnaK, 1.5pmol DnaJ, 3pmol GrpE, 1.5pmol GroEL, and 1.5pmol GroES were added for 0.75pmol 23S rRNA, along with an additional 1mM ATP. Chaperone addition did not provide a benefit.

## Supplementary Table 3

| Function                        | Products            | 54 Genes | Base Pairs | Peptide Bonds |
|---------------------------------|---------------------|----------|------------|---------------|
| Ribosomal Protein Large subunit | RL1                 | rplA     | 705        | 233           |
| Ribosomal Protein Large subunit | RL2                 | rplB     | 822        | 272           |
| Ribosomal Protein Large subunit | RL3                 | rplC     | 630        | 208           |
| Ribosomal Protein Large subunit | RL4                 | rplD     | 606        | 200           |
| Ribosomal Protein Large subunit | RL5                 | rplE     | 540        | 178           |
| Ribosomal Protein Large subunit | RL6                 | rplF     | 534        | 176           |
| Ribosomal Protein Large subunit | RL7/RL12 (4 copies) | rplL     | 1464       | 480           |
| Ribosomal Protein Large subunit | RL9                 | rplI     | 450        | 148           |
| Ribosomal Protein Large subunit | RL10                | rplJ     | 498        | 164           |
| Ribosomal Protein Large subunit | RL11                | rplK     | 429        | 141           |
| Ribosomal Protein Large subunit | RL13                | rplM     | 429        | 141           |
| Ribosomal Protein Large subunit | RL14                | rplN     | 372        | 122           |
| Ribosomal Protein Large subunit | RL15                | rplO     | 435        | 143           |
| Ribosomal Protein Large subunit | RL16                | rplP     | 411        | 135           |
| Ribosomal Protein Large subunit | RL17                | rplQ     | 384        | 126           |
| Ribosomal Protein Large subunit | RL18                | rplR     | 354        | 116           |
| Ribosomal Protein Large subunit | RL19                | rplS     | 348        | 114           |
| Ribosomal Protein Large subunit | RL20                | rplT     | 357        | 117           |
| Ribosomal Protein Large subunit | RL21                | rplU     | 312        | 102           |
| Ribosomal Protein Large subunit | RL22                | rplV     | 333        | 109           |
| Ribosomal Protein Large subunit | RL23                | rplW     | 303        | 99            |
| Ribosomal Protein Large subunit | RL24                | rplX     | 315        | 103           |
| Ribosomal Protein Large subunit | RL25                | rplY     | 285        | 93            |
| Ribosomal Protein Large subunit | RL27                | rpmA     | 258        | 84            |
| Ribosomal Protein Large subunit | RL28                | rpmB     | 237        | 77            |
| Ribosomal Protein Large subunit | RL29                | rpmC     | 192        | 62            |
| Ribosomal Protein Large subunit | RL30                | rpmD     | 180        | 58            |
| Ribosomal Protein Large subunit | RL31                | rpmE     | 213        | 69            |
| Ribosomal Protein Large subunit | RL32                | rpmF     | 174        | 56            |
| Ribosomal Protein Large subunit | RL33                | rpmG     | 168        | 54            |
| Ribosomal Protein Large subunit | RL34                | rpmH     | 141        | 45            |
| Ribosomal Protein Large subunit | RL35                | rpmI     | 198        | 64            |
| Ribosomal Protein Large subunit | RL36                | rpmJ     | 117        | 37            |
| Ribosomal Protein Small subunit | RS1                 | rpsA     | 1674       | 556           |
| Ribosomal Protein Small subunit | RS2                 | rpsB     | 726        | 240           |
| Ribosomal Protein Small subunit | RS3                 | rpsC     | 702        | 232           |
| Ribosomal Protein Small subunit | RS4                 | rpsD     | 621        | 205           |
| Ribosomal Protein Small subunit | RS5                 | rpsE     | 504        | 166           |
| Ribosomal Protein Small subunit | RS6                 | rpsF     | 396        | 130           |
| Ribosomal Protein Small subunit | RS7                 | rpsG     | 540        | 178           |
| Ribosomal Protein Small subunit | RS8                 | rpsH     | 393        | 129           |
| Ribosomal Protein Small subunit | RS9                 | rpsI     | 393        | 129           |
| Ribosomal Protein Small subunit | RS10                | rpsJ     | 312        | 102           |
| Ribosomal Protein Small subunit | RS11                | rpsK     | 390        | 128           |
| Ribosomal Protein Small subunit | RS12                | rpsL     | 375        | 123           |
| Ribosomal Protein Small subunit | RS13                | rpsM     | 357        | 117           |
| Ribosomal Protein Small subunit | RS14                | rpsN     | 306        | 100           |
| Ribosomal Protein Small subunit | RS15                | rpsO     | 270        | 88            |
| Ribosomal Protein Small subunit | RS16                | rpsP     | 249        | 81            |
| Ribosomal Protein Small subunit | RS17                | rpsQ     | 255        | 83            |
| Ribosomal Protein Small subunit | RS18                | rpsR     | 228        | 74            |
| Ribosomal Protein Small subunit | RS19                | rpsS     | 279        | 91            |
| Ribosomal Protein Small subunit | RS20                | rpsT     | 264        | 86            |
| Ribosomal Protein Small subunit | RS21                | rpsU     | 216        | 70            |

Total peptide bonds to make all ribosomal proteins = 7434

**Supplementary Table 3** | Calculation of peptide bonds necessary to make a ribosome. Moving across each row is a single ribosomal protein, its product and gene name, the number of base pairs per gene (bp), and the number of peptide bonds necessary to make that gene product. For example, the rplA gene has 705 bp including the UAA stop codon. Thus it has 235 codons, 234 amino acids, and 233 peptide bonds. The sum of all peptide bonds, 7434, is shown. Table adopted from Forster and Church (Forster & Church, 2006).

## Supplementary Figure 1

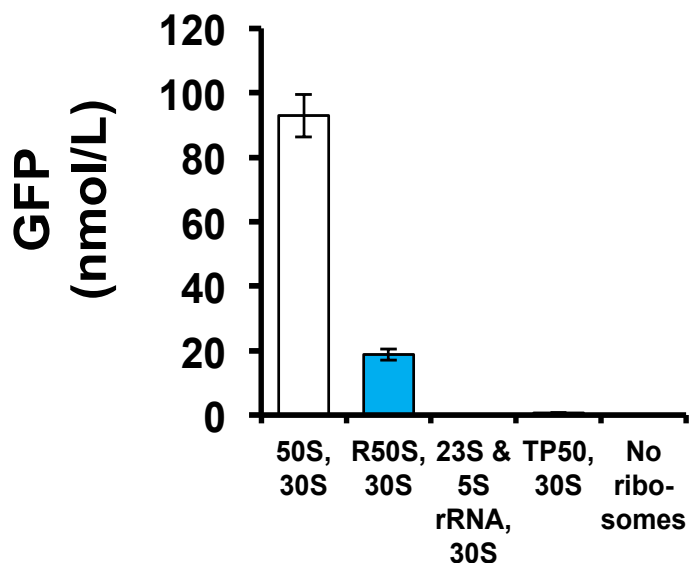

**Supplementary Figure 1 | 50S ribosomal subunits reconstituted using the conventional method synthesize green fluorescent protein (GFP).** GFP production in 15 $\mu$ L ETTA reactions where either 0.1 $\mu$ M native 50S subunits or 0.1 $\mu$ M 50S reconstitution reactions (R50S) were paired with 0.2 $\mu$ M native 30S subunits. Fluorescence was measured following 2h incubation at 30°C and 8h maturation at 4°C. Fluorescence was converted to an estimate of protein concentration using a standard curve created from dilutions of purified GFP (4000 Fluorescence units (arbitrary) ~ 1 $\mu$ g GFP). Reconstitutions in the absence of 23S and 5S rRNA or TP50 did not yield active particles. Control transcription and translation reactions without ribosomes or without GFP template DNA had immeasurable fluorescence. Values shown indicate the mean with error bars representing the s.d. of 4 independent experiments. While reconstitution reactions were competent in GFP synthesis, we chose to complete the study using luciferase because the detection assay was more sensitive.

## Supplementary Figure 2

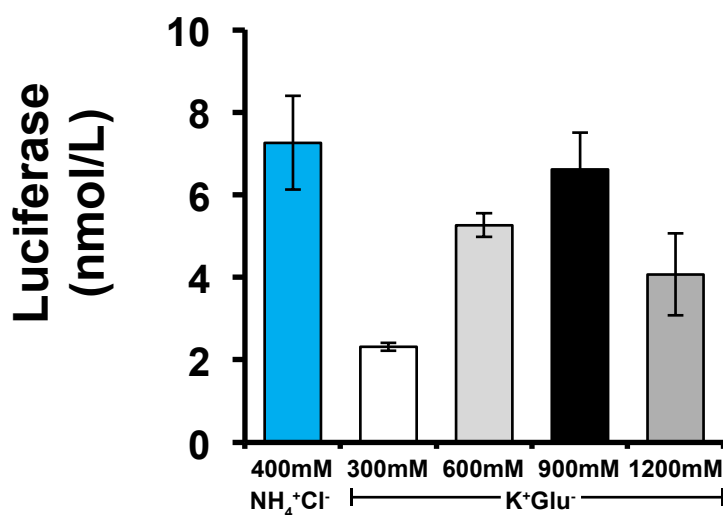

**Supplementary Figure 2 | The optimization of potassium glutamate concentration as a substitute for ammonium chloride in conventional 50S reconstitution.** The activity of 0.1 $\mu$ M 50S reconstitution reactions paired with 0.2 $\mu$ M native 30S subunits was compared for different salt conditions as indicated. The final yield of Fluc following a 2h ETTA reaction at 30°C is shown. Substituting potassium glutamate for ammonium chloride did not impact protein synthesis activity of reconstitution reactions at 900mM potassium glutamate concentration. Reconstitutions in the absence of 23S rRNA and 5S rRNA or TP50 did not yield active particles. Values shown indicate the mean with error bars representing the s.d. of 4 independent experiments.

### Supplementary Figure 3

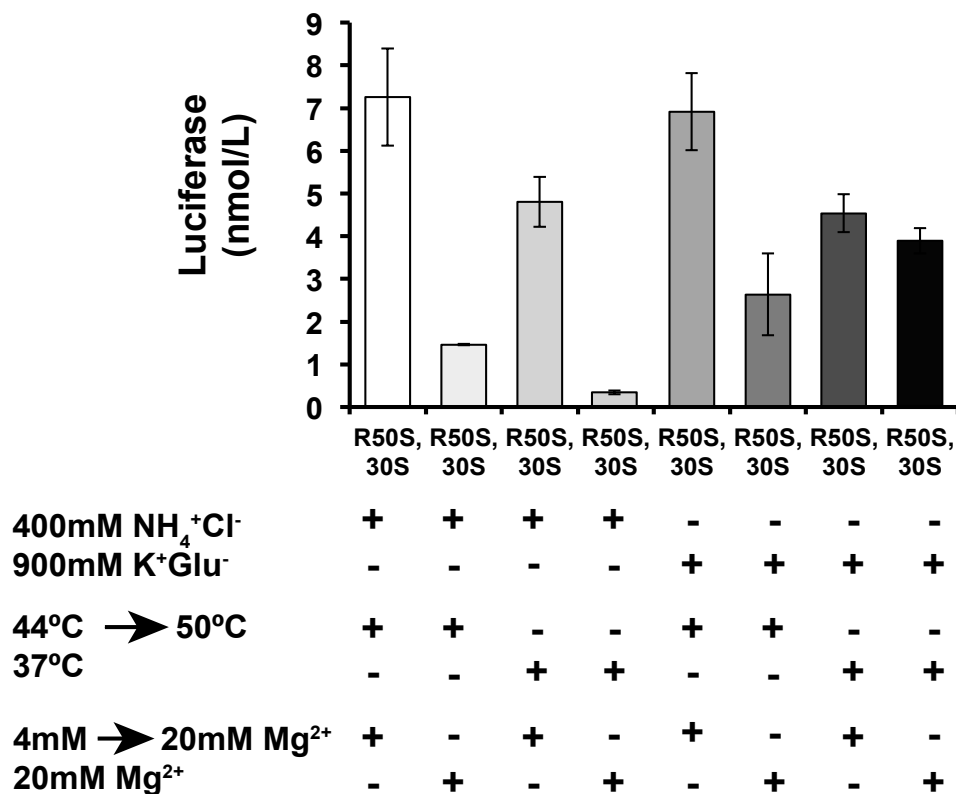

### Supplementary Figure 3 | *E. coli* 50S ribosomal subunits reconstituted using the conventional approach under near-physiological conditions synthesize active Fluc.

Expanded from **Figure 2d**, the dependence of protein synthesis activity on 50S reconstitution is shown for three factors: (1) the concentration of the major ionic component, (2) temperature, and (3) magnesium concentration. “+” or “-” indicate the presence or absence, respectively, of the specified factor in the reconstitution reaction. For the two-step reconstitution procedures (which are indicated with arrows such as 44°C → 50°C), 20-min incubation was followed by 90-min incubation. For the one-step procedure, reconstitution was carried out for 120-min. Following reconstitution, ETNA reactions with 0.1μM 50S reconstitution reactions (R50S) from specified conditions paired with 0.2μM native 30S subunits were compared. The final yield of Fluc following a 2h incubation at 30°C is shown. One-step reconstitution is achieved under near-physiological conditions (see black bar far right). Reconstitutions in the absence of 23S rRNA and 5S rRNA or TP50 did not yield active particles (not shown). Values shown indicate the mean with error bars representing the s.d. of 4 independent experiments.

## Supplementary Figure 4

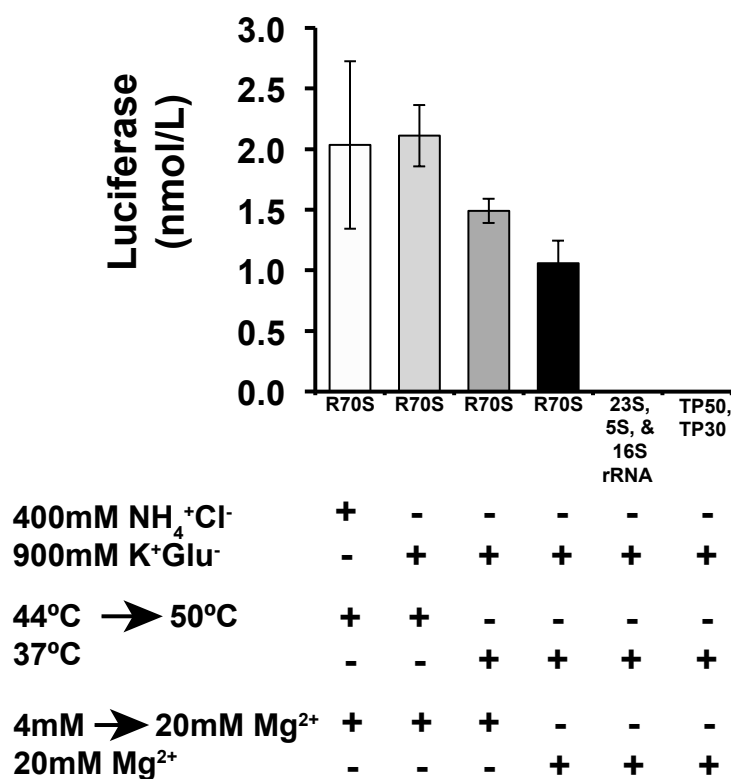

**Supplementary Figure 4 | *E. coli* 70S ribosomes reconstituted using the conventional approach under near-physiological conditions synthesize active Fluc.** The dependence of protein synthesis activity on 70S reconstitution is shown for three factors: (1) the concentration of the major ionic component, (2) temperature, and (3) magnesium concentration. “+” or “-” indicate the presence or absence, respectively, of the specified factor in the reconstitution reaction. For the two-step reconstitution procedures (which are indicated with arrows such as 44°C → 50°C), 20-min incubation was followed by 90-min incubation. For the one-step procedure, reconstitution was carried out for 120-min. Following reconstitution, protein yields synthesized in the ETTA system with 0.1μM 70S reconstitution reactions (R70S) from specified conditions were compared. The final yield of Fluc following a 2h incubation at 30°C is shown. One-step reconstitution was achieved under near physiological conditions (see black bar). Reconstitutions in the absence of ribosomal proteins or rRNA did not yield active particles (far right). Values shown indicate the mean with error bars representing the s.d. of 4 independent experiments.



## Supplementary Figure 5

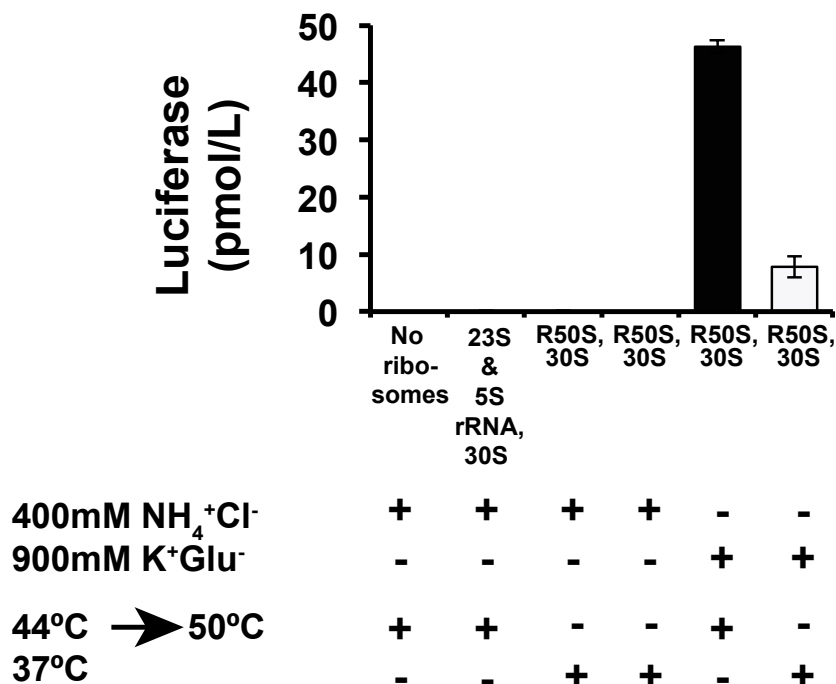

**Supplementary Figure 5 | Fluc production from ribosomes reconstituted using the conventional approach is markedly decreased in ET TA reactions when the chemical composition of the classical poly (Phe) translation system is used instead of the Cytomim system from this study.** Although our study primarily focuses on ribosome reconstitution protocols, major differences exist between the ET TA system used in this study and that used in previous works (see **Supplementary Table 1**). Here, we test protein synthesis activity of 50S reconstitution reactions (R50S) derived from different protocols in the chemical composition of the classical poly (Phe) translation system reported previously (Nierhaus, 1990). Each reconstitution included a two-step [Mg<sup>2+</sup>] change from 4mM → 20mM. “+” or “-” indicate the presence or absence, respectively, of the specified factor in the reconstitution reaction. Following reconstitution, ET TA reactions with 0.1μM 50S reconstitution reactions from specified conditions paired with 0.2μM native 30S subunits were compared. The final yield of Fluc following a 2h incubation at 30°C is shown. Fluc synthesis using ribosomes reconstituted with 400mM ammonium chloride was immeasurable. In contrast, 50S ribosomes reconstituted in glutamate salts synthesized active protein in an ET TA reaction, suggesting advantages for our new protocol. Based on final Fluc titers, our ET TA system designed to mimic the cytoplasm was ~150-fold more productive in the two-step temperature protocol and ~650-fold more productive

in the isothermal protocol than when the ionic environment of the classic poly (Phe) system was used (See **Figure 2** for comparison). These results demonstrate the importance of developing a coordinated ribosome assembly and translation platform. Values shown indicate the mean with error bars representing the s.d. of 4 independent experiments.

## Supplementary Figure 6

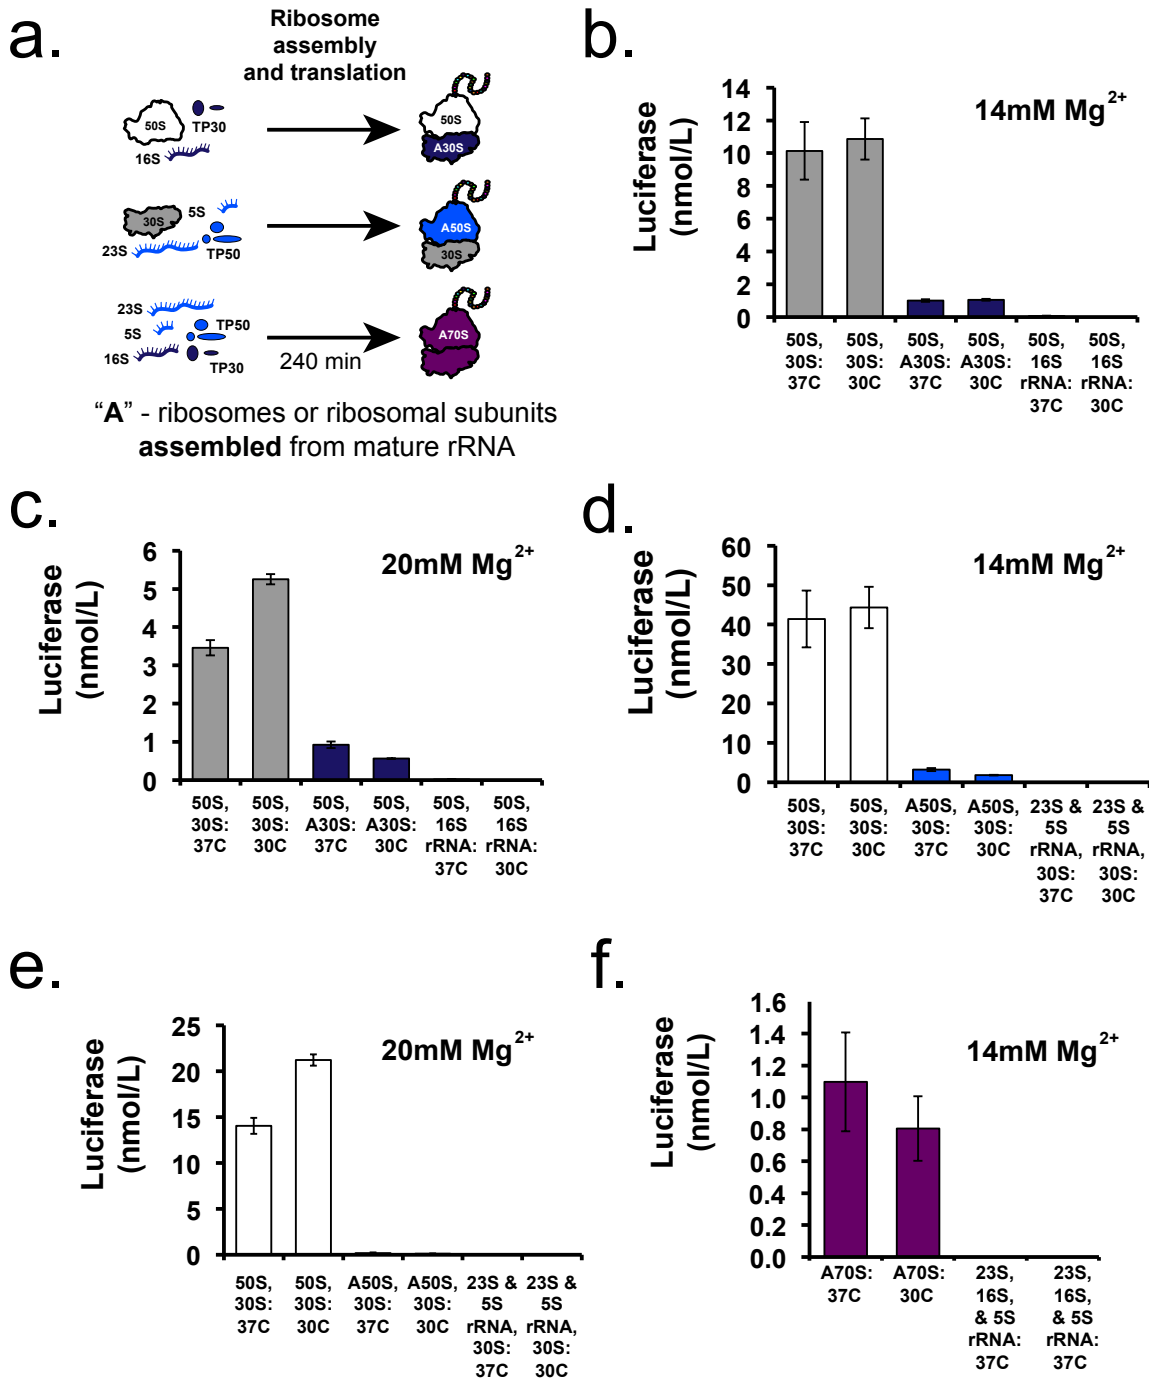

Supplementary Figure 6 | The impact of temperature and magnesium concentration on combined ribosome assembly and translation in an S150 extract based ET TA system. a,

Schematic of combined ribosome assembly and translation. Temperature and magnesium concentration were varied to identify parameters leading to the highest level of luciferase synthesis. Temperatures shown include 30°C (the optimum temperature for active Fluc synthesis) and 37°C (the physiological temperature for optimum *E. coli* growth and the temperature used in one-step reconstitution experiments). Magnesium concentrations shown include 20mM Mg<sup>2+</sup> (the experimentally determined optimum for conventional 30S and 50S reconstitution) and 14mM Mg<sup>2+</sup> (the experimentally determined optimum for the extract based transcription and translation system). The experimentally determined magnesium concentration optimum is higher than those typically used for *in vitro* translation systems composed of purified components (~5 mM) (Jelenc & Kurland, 1979; Pavlov & Ehrenberg, 1996), although somewhat similar to the poly (Phe) system of Nierhaus (Nierhaus, 1990) (**Supplementary Table 1**) and to the PURExpress<sup>®</sup> translation system (Shimizu et al, 2001; Shimizu et al, 2005). This discrepancy likely results from our use of an extract based protein synthesis system designed to mimic the intracellular physicochemical environment (Jewett et al, 2008; Jewett & Swartz, 2004). The concentration of glutamate in the extract based system used here is ~150 mM, which is significantly higher than *in vitro* translation systems that have magnesium concentration optimums around 5mM (Jelenc & Kurland, 1979; Pavlov & Ehrenberg, 1996). Since the reported log stability constant for [MgGlu<sup>-</sup>] / [Mg][Glu] is 1.9 (Dawson, 1990), it seems reasonable that 150mM glutamate would have a strong buffering effect on the concentration of free Mg<sup>2+</sup> and would therefore impact the observed optimum for total [Mg<sup>2+</sup>]. **b,c**, The protein synthesis activities of either 0.2μM native 30S subunits or 0.2μM 30S ribosomal subunit components (e.g., mature 16S rRNA and TP30: A30S) paired with 0.4μM native 50S subunits were compared at different temperature and magnesium concentrations. The final yield of Fluc following a 4h ETTA reaction is shown. Reactions in the absence of TP30 did not yield active particles. **d,e**, The protein synthesis activities of either 0.2μM native 50S subunits or 0.2μM 50S ribosomal subunit components (e.g., mature 23S rRNA, 5S rRNA and TP50: A50S) paired with 0.4μM native 30S subunits were compared at different temperature and magnesium concentrations. The final yield of Fluc following a 4h ETTA reaction is shown. Reactions in the absence of TP50 did not yield active particles. **f**, The protein synthesis activities of 0.2μM native 70S ribosome components (A70S) were compared at different temperature and magnesium concentrations. The final yield of Fluc following a 4h ETTA reaction is shown. Reactions in the absence of TP70 did not yield active particles. Protein synthesis from assembly of 70S ribosomes at 20mM Mg<sup>2+</sup> was not measurable. In all cases, combined ribosome assembly and translation activity was

higher at 37°C and 14mM Mg<sup>2+</sup>. Values shown indicate the mean with error bars representing the s.d. of 4 independent experiments.

## Supplementary Figure 7

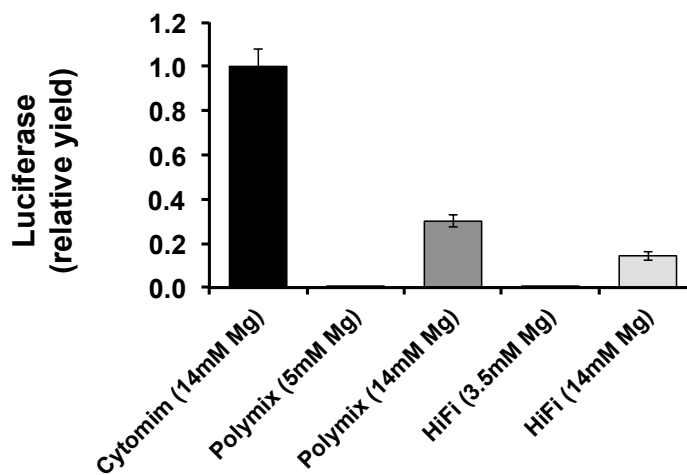

**Supplementary Figure 7 | The impact of changing the Cytomim buffer used in this study with conventional polymix (Jelenc & Kurland, 1979) and HiFi (Gromadski & Rodnina, 2004) translation buffers on combined 50S ribosome assembly and translation reactions.**

Reactions were carried out in S150 extracts for 4h at 37°C. Three buffers were used (i) Cytomim buffer (this study) - 14mM Mg (Glu)<sub>2</sub>, 130mM K (Glu), 10mM NH<sub>4</sub> (Glu), 1mM putrescine, 1.5mM spermidine; (ii) Polymix buffer - 5mM Mg (OAc)<sub>2</sub> or 14mM Mg (OAc)<sub>2</sub> and 95mM KCl, 5mM NH<sub>4</sub>Cl, 8mM putrescine, 1 mM spermidine, 1mM DTT, 5mM K<sub>2</sub>HPO<sub>4</sub>, and 0.5mM CaCl<sub>2</sub> (magnesium concentration is indicated above); and (iii) HiFi buffer - 3.5mM MgCl<sub>2</sub> or 14mM MgCl<sub>2</sub> and 30mM KCl, 70mM NH<sub>4</sub>Cl, 8mM putrescine, 0.5mM spermidine, 1mM DTT, and 50mM Tris HCl, pH 7.5 (magnesium concentration is indicated above). The glutamate buffer used in this study enables at least 4-fold higher levels of luciferase synthesis at the same magnesium concentration. The use of lower magnesium concentration yielded no active particles. Values shown indicate the mean with error bars representing the s.d. of 4 independent experiments.

## Supplementary Figure 8

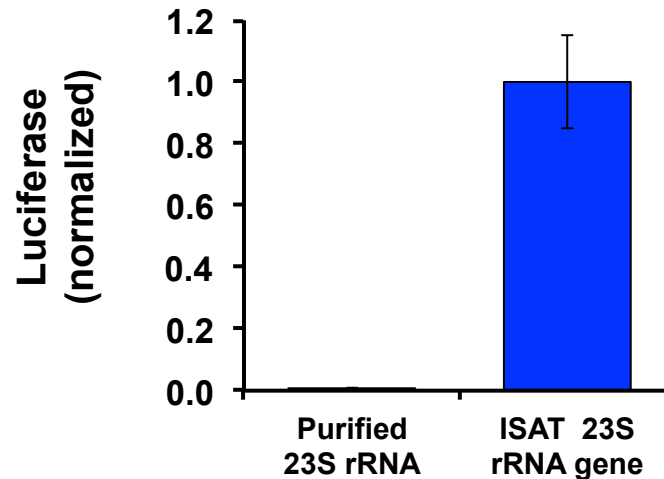

**Supplementary Figure 8 | The impact of substituting *in vitro* transcribed and purified 23S rRNA for the 23S rRNA gene in an iSAT reaction making 50S subunits.** The final yield of Fluc after a 4h reaction at 37°C from 0.2µM 50S ribosomal components having purified *in vitro* transcribed 23S rRNA added to a ribosome assembly and translation assay (Purified 23S rRNA) as compared to *in vitro* transcribed 23S rRNA from the 23S rRNA gene (iSAT) paired with 0.4µM native 30S subunits. Reactions in the absence of 23S rRNA did not yield active particles (not shown). The ~200-fold greater luciferase synthesis capability of the iSAT approach suggests benefits for co-rRNA transcription and ribosome assembly in the presence of S150 extract. Values shown indicate the mean with error bars representing the s.d. of 3 independent experiments.

## Supplementary Figure 9

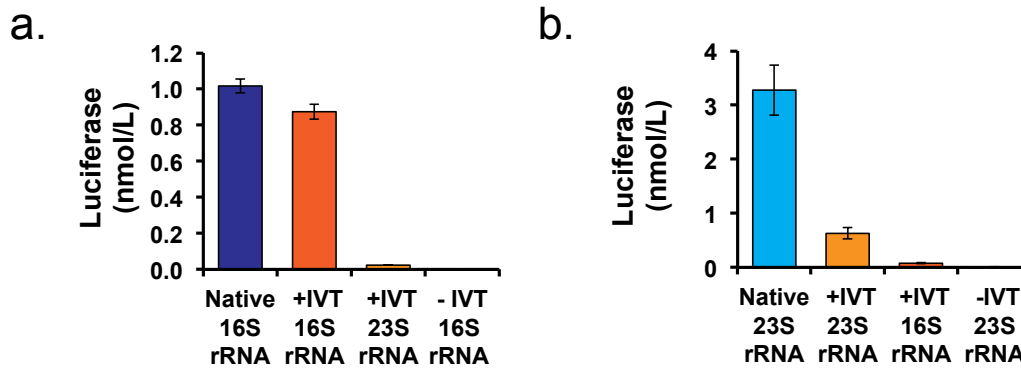

**Supplementary Figure 9 | Synthesis of non-specific rRNA in reactions integrating rRNA synthesis, ribosome assembly, and translation (iSAT) demonstrates that possible contaminating native rRNA is not masked by excess ribosomal proteins.** To test that the activity of our *in vitro* transcribed rRNA was not the result of unmasking some minor level of contaminating native rRNA from the purified TP50 or TP30 mixtures (as previously observed in the RNase P field (Gold & Altman, 1986)), we carried out rRNA swapping experiments as inbuilt controls. Since unmasking may conceivably have some sequence specificity, it should also be noted that there is an excess of tRNA and luciferase mRNA in the reactions. Moreover, we also point out that unmasking has not previously been reported when using *in vitro* transcribed rRNA to assemble ribosomes (Green & Noller, 1996; Semrad & Green, 2002). **a**, 23S rRNA was transcribed in 30S subunit iSAT reactions by substituting plasmid pCW1 (encoding the gene for 23S rRNA) for pWK1 (encoding the gene for 16S rRNA). The final yields of Fluc after a 4h reaction at 37°C from 0.2μM 30S ribosomal parts having mature 16S rRNA (native), *in vitro* transcribed 16S rRNA (+IVT), *in vitro* transcribed 23S rRNA (+IVT), and no 16S rRNA (-IVT) paired with 0.4μM native 50S subunits were compared. Reactions in the absence of 16S rRNA did not yield active particles. Doping in purified naturally derived 23S rRNA into 30S assembly reactions with *in vitro* transcribed 16S rRNA had no effect (not shown). **b**, 16S rRNA was transcribed in 50S subunit iSAT reactions by substituting plasmid pWK1 for pCW1. The final yields of Fluc after a 4h reaction at 37°C from 0.2μM 50S ribosomal parts having mature 23S rRNA (native), *in vitro* transcribed 23S rRNA (+IVT), *in vitro* transcribed 16S rRNA (+IVT), and no 23S rRNA (-IVT) paired with 0.4μM native 30S subunits were compared. Reactions in the absence of 23S rRNA did not yield active particles. Doping in purified naturally derived 16S rRNA into 50S assembly reactions with *in vitro* transcribed 23S rRNA had no effect (not shown).



Values shown indicate the mean with error bars representing the s.d. of 4 independent experiments.

## Supplementary Figure 10

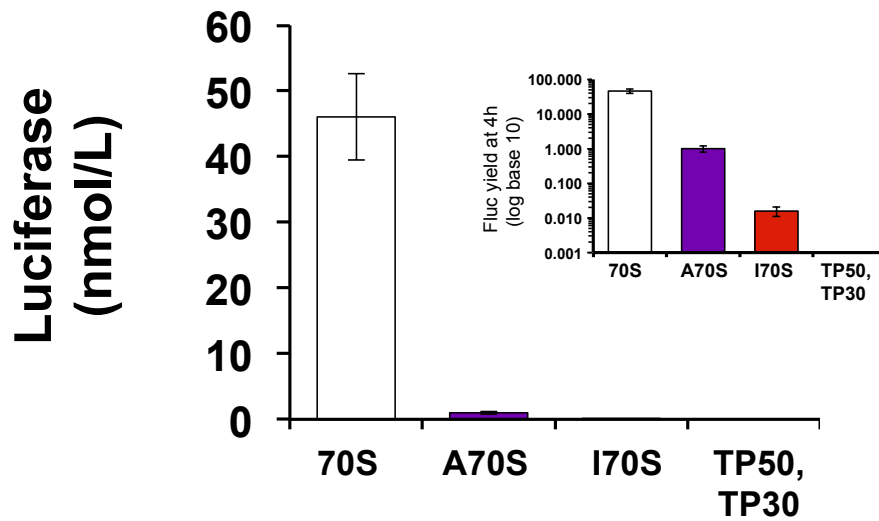

### Key:

“A” - ribosomes or ribosomal subunits **assembled** from mature rRNA  
“I” - ribosomes or ribosomal subunits built using **iSAT**

**Supplementary Figure 10 | Translation activity of 70S ribosomes assembled from *in vitro* synthesized 23S and 16S rRNA in an S150 extract-based ETTA system.** The protein synthesis activities of tightly coupled 70S ribosomes as well as 70S ribosomes assembled from mature 16S and 23S rRNA (A70S) or with *in vitro* transcribed 16S and 23S rRNA (I70S) were assessed following a 4h incubation at 37°C. The final yield of Fluc following 4h ETTA reactions at 37°C is shown. Inset shows Fluc yield values at 4h on a log scale (base 10). Reactions without rRNA (TP50, TP30) did not yield active particles. Values shown indicate the mean with error bars representing the s.d. of 4 independent experiments.

## Supplementary Figure 11

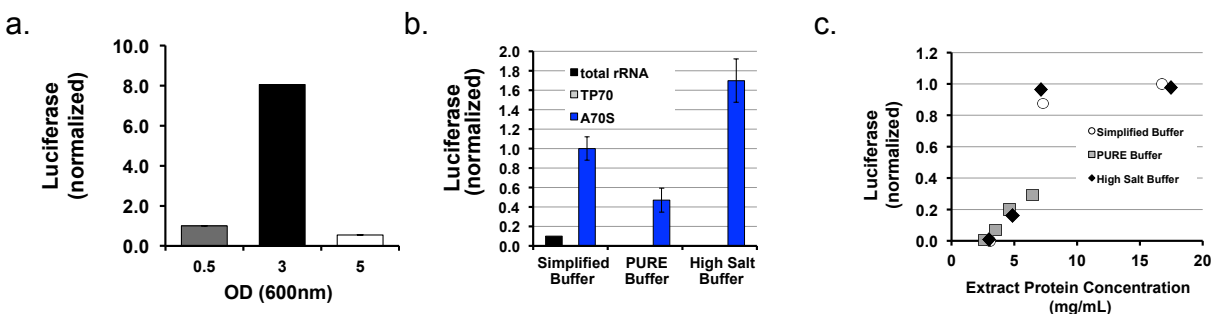

**Supplementary Figure 11 | Alterations to the S150 extract preparation protocol enhance integrated ribosome assembly and translation.** The protein synthesis activities of 70S ribosomal components (*i.e.*, mature 23S, 16S and 5S rRNA (total rRNA), and total protein of the 70S ribosome (TP70)) were compared in an S150 assembly and translation reaction following a 4h incubation at 37°C. **a**, The impact of harvest OD<sub>600</sub> on ribosome assembly and translation. Specifically, we explored whether harvesting cells for S150 extract preparation in mid-exponential phase (rather than early log phase OD<sub>600</sub> = 0.5) would provide benefits. Accordingly, we grew MRE600 cells to 0.5, 3, and 5 OD<sub>600</sub>. The most active extracts were from cultures harvested at OD<sub>600</sub> = 3.0. Negative control reactions (*e.g.*, total rRNA or TP70 alone) gave immeasurable results over all conditions (data not shown). **b**, The impact of extract buffer on S150 extract activity. Three extracts were prepared as originally described, except the cells were grown in a 10L fermentor to OD<sub>600</sub> = 3.0, and one of three dialysis buffers was used: Simplified Buffer (10 mM TrisOAc, pH 7.5 at 4°C, 10 mM Mg (OAc)<sub>2</sub>, 2 mM DTT), PURE Buffer (50 mM HEPES-KOH pH 7.6, 100 mM KGlu, 13 mM Mg (OAc)<sub>2</sub>, 2 mM spermidine, 1 mM DTT), or High Salt Buffer (10 mM TrisOAc, pH 7.5 at 4°C, 10 mM Mg (OAc)<sub>2</sub>, 20 mM NH<sub>4</sub>OAc, 30 mM KOAc, 200 mM KGlu, 1 mM spermidine, 1 mM putrescine, 1 mM DTT). The High Salt Buffer enabled the highest yields of luciferase following an assembly and translation reaction. Reactions in the absence of total rRNA or TP70 are also shown. **c**, The impact of condensation on extract activity. The protein synthesis activities from extracts condensed to different concentrations, and dialyzed with different buffers as indicated, were assessed. We found extract protein concentration of about 10mg/mL to have maximum luciferase synthesis. Note that this is not the total protein concentration of the ETNA reaction, which is 4-fold lower. Values shown indicate means with error bars representing the s.d. of 3 independent experiments.

## Supplementary Figure 12

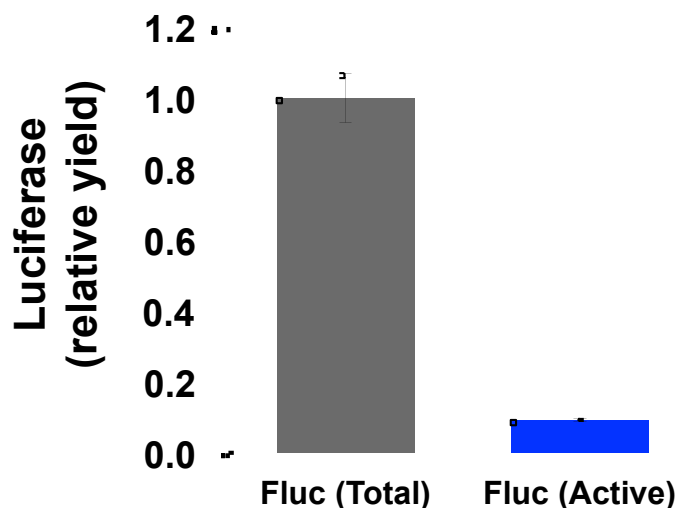

**Supplementary Figure 12 | Comparison of total and active luciferase production.** Here, Fluc synthesis is carried out at 37°C for 4h in S150 ETTA reactions. The normalized protein synthesis activity from 0.2 $\mu$ M native 50S subunits paired with 0.4 $\mu$ M native 30S subunits, 0.2 $\mu$ M 50S ribosomal parts (e.g., mature 23S rRNA, 5S rRNA and TP50) paired with 0.4 $\mu$ M native 30S subunits, and 0.2 $\mu$ M 30S ribosomal parts (e.g., mature 16S rRNA and TP30) paired with 0.4 $\mu$ M native 50S subunits are averaged in the above data (n=2 for each case). For both native and assembled ribosomes, ~10% of luciferase synthesized is active. Total yield of Fluc as determined by <sup>14</sup>C-leucine incorporation by TCA precipitable counts using a filter paper assay and liquid scintillation counting (grey bar). Active yield of Fluc as determined by enzymatic assay (blue bar).

If one were to assume 100% yield of active ribosomes (*i.e.*, all ribosomal components assemble into functional translating ribosomes) and 100% active luciferase, approximately  $13 \pm 3$  and  $106 \pm 8$  peptide bonds per 70S ribosome assembled from *in vitro* transcribed or mature 23S and 16S rRNA, respectively, were synthesized in the enhanced extracts (**Figure 4a**). However, we measured that only about 10% of the luciferase produced in our system is active, with either native or assembled ribosomes (see above). If we estimate that the assembly efficiency in our extract based system is as good as the traditional method (~50%), then our data suggest that the system is synthesizing about  $260 \pm 60$  or  $2120 \pm 160$  peptide bonds per ribosome (*i.e.*,  $13 \pm 3 / (10\% * 50\%)$ ) from *in vitro* transcribed or mature 23S and 16S rRNA, respectively. For

comparison, the best batch S30 crude extract cell-free protein synthesis systems (~10g *E. coli* protein/L with ribosomes) synthesize ~10,000-15,000 peptide bonds per ribosome (Jewett & Forster, 2010). *In vivo* (~200g *E. coli* protein/L), we estimate that about 45,000 ± 10,000 peptide bonds per ribosome are made. This estimate for *in vivo* capability was calculated using two different approaches. In one approach, we use the rRNA to protein ratio (Neidhardt, 1987). For example, if the mass ratio is 15%/6% and there are 4566 rNMPs per ribosome and the monomer mass ratio is 330/110 then  $(15/6) \cdot (330/110) \cdot 4566 \sim 35,000$  peptide bonds per ribosome. Using an alternative approach, one estimates ~ 55,000 peptide bonds per ribosome. If the cellular concentration is ~200g protein/L (Record et al, 1998a; Record et al, 1998b), then to double the cell needs to remake it's protein complement. Using an average amino acid MW of 110g/mol, a ribosome concentration of 42μM and estimating 80% active ribosomes in translation (Underwood et al, 2005), then  $(200\text{g/L}) \cdot (\text{mol}/110\text{g}) \cdot (10^6 \mu\text{M}/\text{M}) \cdot (1 / (42 \mu\text{M} \cdot 0.8)) \sim 55,000$  peptide bonds per ribosome.

## Supplementary Figure 13

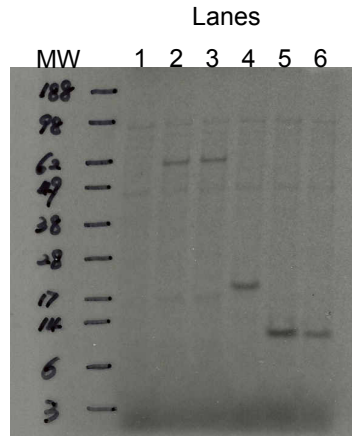

**Supplementary Figure 13 | Autoradiogram showing  $^{35}\text{S}$ -methionine incorporation into proteins synthesized by ribosomes assembled using the iSAT method.** Combined 23S rRNA transcription, 50S subunit assembly, and translation reactions (15 $\mu\text{L}$ ) with 0.2 $\mu\text{M}$  30S subunits and 0.1 $\mu\text{M}$  50S components (5S rRNA and TP50) and the plasmid encoding 23S rRNA. Reactions were carried out for 4h at 37°C. Lane 1: negative control – no 23S rRNA with luciferase plasmid. Lane 2: luciferase plasmid, expected size 61kDa. Lane 3: luciferase plasmid, expected size 61kDa. Lane 4: dihydrofolate reductase (DHFR) plasmid, expected size 18kDa. Lane 5: rpsJ plasmid, expected size 12kDa. Lane 6: rpsJ plasmid, expected size 12kDa. Lanes 5 and 6 show that ribosomes assembled from *in vitro* transcribed 23S rRNA can synthesize r-proteins, suggesting the potential for making all r-proteins.

## Supplementary Figure 14

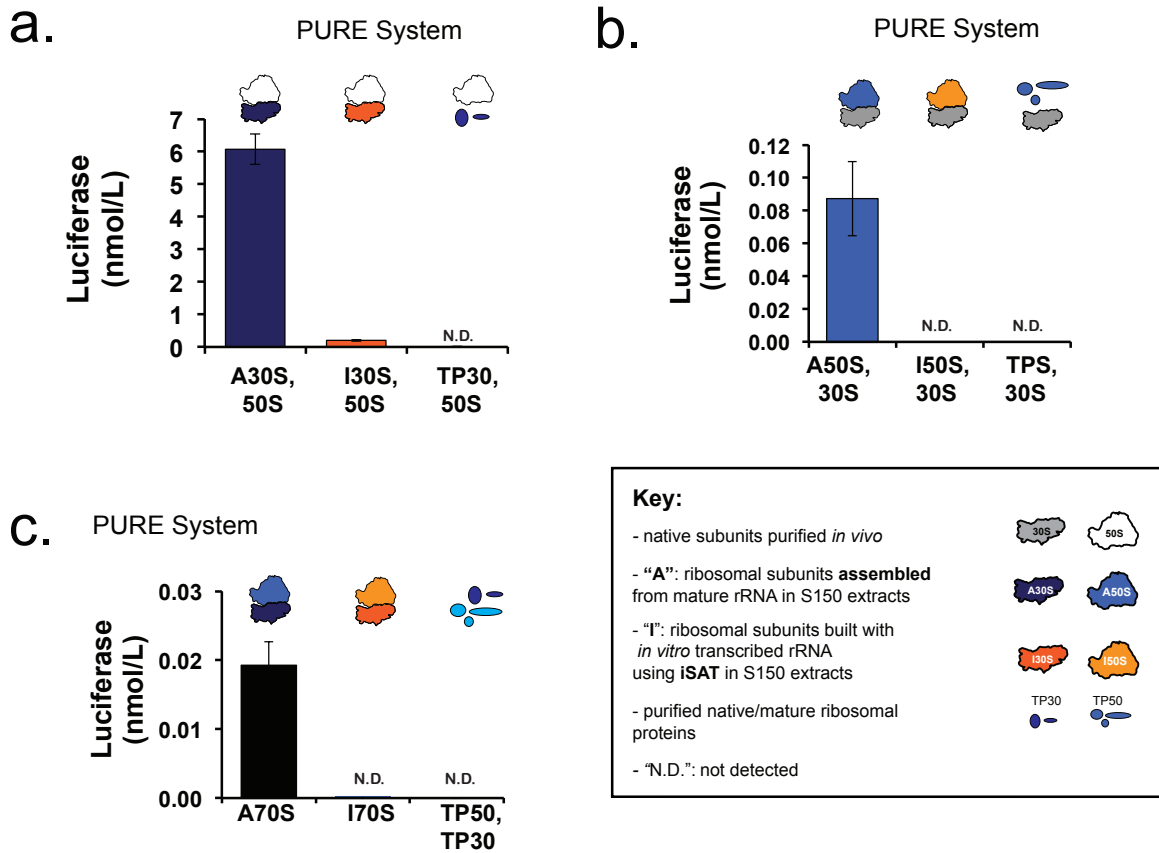

**Supplementary Figure 14 | Integrated ribosome assembly and translation in the PURExpress® system lacking ribosomes.** **a**, The protein synthesis activities of 0.4 $\mu$ M assembled 30S subunits paired with 0.8 $\mu$ M native 50S subunits in the PURExpress® translation system lacking ribosomes. Subunits were either assembled from mature ribosomal parts (A30S) or built using the iSAT approach (I30S), where the mature 16S rRNA was replaced by the 16S rRNA gene behind the T7 promoter. Reactions in the absence of 16S rRNA (negative control) did not yield active particles. **b**, The protein synthesis activities of 0.4 $\mu$ M assembled 50S subunits paired with 0.8 $\mu$ M native 30S subunits were assessed following a 4h incubation at 37°C. 50S subunits were assembled from mature ribosomal components (A50S). However, the iSAT approach (I50S), where the mature 23S rRNA was replaced by the 23S rRNA gene behind the T7 promoter, did not yield active ribosomes. This defines the current block to fully characterized ribosome synthesis. Reactions in the absence of 23S rRNA (negative control) did not yield active particles. **c**, The protein synthesis activities of 0.4 $\mu$ M 70S ribosomes were assessed following a 4h incubation at 37°C. 70S subunits were assembled from mature

ribosomal components (A70S). However, the iSAT approach (I70S), where mature 23S and 16S rRNAs were replaced by the 23S and 16S rRNA genes behind T7 promoters, did not yield active ribosomes. Reactions in the absence of rRNA (negative control) did not yield active particles. Values shown indicate means with error bars representing the s.d. of 4 independent experiments.



## Supplementary Figure 15

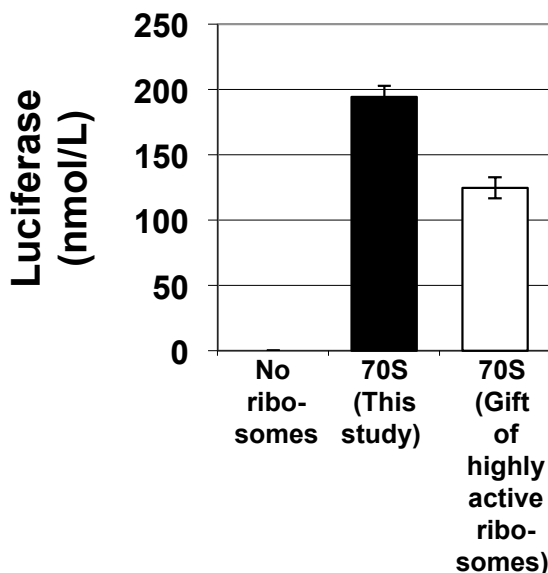

**Supplementary Figure 15 | Comparison of Fluc production between our control 70S ribosomes (this study) and an independent set of 70S ribosomes (gift) demonstrates high ribosome quality.** We tested our ribosome quality in head-to-head ET TA reactions against an independent set of highly active coupled 70S ribosomes that were given to us as a generous gift and had been purified according to Rodnina and Wintermeyer (Rodnina & Wintermeyer, 1995). ET TA reactions with 0.5 $\mu$ M 70S ribosomes were carried out at 37°C for 4h. Synthesis of active luciferase was determined by enzymatic assay. Values shown indicate means with error bars representing the s.d. of 4 independent experiments.

## References

- Dawson RMC, Elliott, D.C., Elliott, W.H. and Jones K.M. (1990) *Data for biochemical research.*, New York, NY: Oxford University Press.
- Forster AC, Church GM (2006) Towards synthesis of a minimal cell. *Mol Syst Biol* **2**: 45
- Gold HA, Altman S (1986) Reconstitution of RNAase P activity using inactive subunits from E. coli and HeLa cells. *Cell* **44**: 243-249
- Green R, Noller HF (1996) In vitro complementation analysis localizes 23S rRNA posttranscriptional modifications that are required for Escherichia coli 50S ribosomal subunit assembly and function. *RNA* **2**: 1011-1021
- Gromadski KB, Rodnina MV (2004) Kinetic determinants of high-fidelity tRNA discrimination on the ribosome. *Mol Cell* **13**: 191-200
- Jelenc PC, Kurland CG (1979) Nucleoside triphosphate regeneration decreases the frequency of translation errors. *Proc Natl Acad Sci U S A* **76**: 3174-3178
- Jewett MC, Calhoun KA, Voloshin A, Wu JJ, Swartz JR (2008) An integrated cell-free metabolic platform for protein production and synthetic biology. *Mol Syst Biol* **4**: 220
- Jewett MC, Forster AC (2010) Update on designing and building minimal cells. *Curr Opin Biotechnol* **21**: 697-703
- Jewett MC, Swartz JR (2004) Mimicking the Escherichia coli cytoplasmic environment activates long-lived and efficient cell-free protein synthesis. *Biotechnol Bioeng* **86**: 19-26
- Neidhardt FC (1987) *Escherichia coli and Salmonella typhimurium: Cellular and Molecular Biology*, Washington, DC: American Society for Microbiology.
- Nierhaus KH (1990) *Reconstitution of ribosomes, in Ribosomes and Protein Synthesis, A Practical Approach*, Oxford: Oxford University Press.
- Pavlov MY, Ehrenberg M (1996) Rate of translation of natural mRNAs in an optimized in vitro system. *Arch Biochem Biophys* **328**: 9-16
- Record MT, Jr., Courtenay ES, Cayley DS, Guttman HJ (1998a) Responses of E. coli to osmotic stress: large changes in amounts of cytoplasmic solutes and water. *Trends Biochem Sci* **23**: 143-148
- Record MT, Jr., Courtenay ES, Cayley S, Guttman HJ (1998b) Biophysical compensation mechanisms buffering E. coli protein-nucleic acid interactions against changing environments. *Trends Biochem Sci* **23**: 190-194
- Rodnina MV, Wintermeyer W (1995) GTP consumption of elongation factor Tu during translation of heteropolymeric mRNAs. *Proc Natl Acad Sci U S A* **92**: 1945-1949

Semrad K, Green R (2002) Osmolytes stimulate the reconstitution of functional 50S ribosomes from in vitro transcripts of Escherichia coli 23S rRNA. *RNA* **8**: 401-411

Shimizu Y, Inoue A, Tomari Y, Suzuki T, Yokogawa T, Nishikawa K, Ueda T (2001) Cell-free translation reconstituted with purified components. *Nat Biotechnol* **19**: 751-755

Shimizu Y, Kanamori T, Ueda T (2005) Protein synthesis by pure translation systems. *Methods* **36**: 299-304

Underwood KA, Swartz JR, Puglisi JD (2005) Quantitative polysome analysis identifies limitations in bacterial cell-free protein synthesis. *Biotechnol Bioeng* **91**: 425-435
